*Association between land cover, plant genera and pollinator dynamics in mixed-use  
landscapes*

Vishesh L. Diengdoh<sup>1</sup>, e: [vishesh.diengdoh@utas.edu.au](mailto:vishesh.diengdoh@utas.edu.au), ORCID: <https://orcid.org/0000-0002-0797-9261>

Barry W. Brook<sup>1,2</sup> - e: [barry.brook@utas.edu.au](mailto:barry.brook@utas.edu.au)

Mark Hunt<sup>1,3</sup> - e: [M.Hunt@utas.edu.au](mailto:M.Hunt@utas.edu.au)

Stefania Ondei<sup>1</sup> - e: [stefania.ondei@utas.edu.au](mailto:stefania.ondei@utas.edu.au)

<sup>1</sup>School of Natural Sciences, University of Tasmania, Private Bag 55, Hobart TAS 7005  
Australia

<sup>2</sup>ARC Centre of Excellence for Australian Biodiversity and Heritage, Australia

<sup>3</sup>ARC Industrial Transformation Training Centre for Forest Value, Australia

**Corresponding Author:** Vishesh L. Diengdoh

**Acknowledgements**

This work was supported by the Australian Research Council [grant number FL160100101].

The authors acknowledge the Pydairrme people, traditional custodians of the land where fieldwork was carried out. We thank the different landowners for permission provided to carry out fieldwork on their properties. We would also like to thank the volunteers who assisted with fieldwork.

1 **Abstract**

2 Context.

3 Land-use change threatens pollinators globally. However, pollinator-landscape studies tend to  
4 focus on certain focal taxa and landscapes with intensive human activities. This limits the  
5 implementation of targeted management policies for landscapes with different modifications  
6 and pollinator groups.

7 Objectives.

8 This study aims to determine which habitat characteristics can predict abundance and  
9 richness of multiple pollinator groups.

10 Methods.

11 We collected field data on the relative abundance and observed richness of nectivorous birds,  
12 bees, beetles, butterflies across a mixed-use landscape in the Tasman Peninsula, Tasmania,  
13 Australia; and determined if they could be predicted using land use, land cover at different  
14 radii (100 m to 5000 m), plant genera and floral morphologies.

15 Results.

16 Using feature selection, we found land use was an overall poor predictor, with land cover,  
17 plant genera and floral morphologies being superior. Random forest was used for predictive  
18 modelling and goodness of fit  $R^2$  calculated was highest and lowest for butterfly abundance  
19 (0.65) and butterfly richness (0.08) respectively. Variable importance was calculated, and  
20 forest cover achieved the highest importance value for nectivorous birds and butterflies,  
21 whereas open cover was most important for bees and the presence of the plant genus  
22 *Leptospermum* for beetles.

23 Conclusions.

24 Our results emphasise the importance of considering multiple habitat factors to manage and  
25 support a dynamic pollinator community. We demonstrate how predictive modelling can be  
26 used to make informed decisions on how to have a dynamic pollinator community in a way  
27 that can be applied to real-world scenarios to validate the models and further improve  
28 decision making.

29

30 **Keywords**

31 Honey bees, native bees, honeyeaters, Exoneura, Lasioglossum

## 32 **Introduction**

33 Pollinators (animal vectors of pollen) are important ecosystem components, assisting in the  
34 sexual reproduction of plants (Kevan and Viana 2003). They are estimated to pollinate 70%  
35 of global crops (Klein et al. 2007) and 87% of wild plants (Ollerton et al. 2011). Flying  
36 insects, such as bees, beetles, and butterflies, play a particularly important role in pollinating  
37 crops (Rader et al. 2016) and wild plants (Winfree et al. 2011). Birds such as honeyeaters  
38 also act as pollinators, particularly in the Austral and Oceanic regions, where they pollinate  
39 more than 10% of the flora (Sekercioglu 2006).

40 Pollinators are declining globally (Maes and Van Dyck 2001; Ollerton et al. 2014; Regan et  
41 al. 2015). The causes are many and include land-use change (LUC: habitat loss and  
42 fragmentation), introduced and invasive species, agrochemicals, climate change, and the  
43 interactions and synergies between these threats (Potts et al. 2010; Regan et al. 2015;  
44 Vanbergen et al. 2013). Of these, LUC is considered the most important threat to pollinators  
45 as it reduces plant abundance and diversity, which in turn reduces the availability of floral  
46 resources (Baude et al. 2016; Nicolson and Wright 2017; Paton 2000).

47 Land-use change can have mixed effects on pollinators (Winfree et al. 2011), with its relative  
48 impact depending on pollinator taxa (Montero-Castaño and Vilà 2012), geographic location  
49 (Archer et al. 2014; De Palma et al. 2016), the amount of native vegetation present (Winfree  
50 et al. 2009) and the intensity of disturbance (Herrera 2018; Senapathi et al. 2015). The  
51 impacts of LUC on pollinators is also influenced by the availability of floral resources  
52 (Winfree et al. 2011) which are known to be a limiting factor for pollinators such as bees  
53 (Roulston and Goodell 2011), butterflies (Öckinger and Smith 2006), and birds (Paton 2000).  
54 Pollinator-landscape studies have typically focused on landscapes with extreme LUC  
55 (Winfree et al. 2011) or on impacts of LUC on focal taxa, like bees (Senapathi et al. 2017).

56 This is a limitation because landscapes with varying degrees of modification and different  
57 suites of pollinator groups might require distinct management policies.

58 The Tasman Peninsula (Tasmania, southern-temperate Australia) provides an excellent case  
59 study as it consists of a mixed-used landscape (see Methods) with multiple pollinator taxa,  
60 including bees, beetles, butterflies, and birds (Hingston and Mc Quillan 2000). The large  
61 island of Tasmania is also rich in plant diversity, with 2,726 vascular plant species, of which  
62 70% are native and the remaining 30% have naturalised from elsewhere (Baker and Duretto  
63 2019). This allows the additional assessment of the impacts of plant genera and floral  
64 morphologies (shape and colour) on different pollinator communities.

65 In this study, we aim to assess the influence of land use (LU), land cover (LC), plant genera,  
66 and floral morphologies on the relative abundance and observed richness of nectivorous  
67 birds, bees, beetles, and butterflies. To do this, we collected field data on the relative  
68 abundance and observed richness of these main pollinator groups across different LU classes,  
69 and analysed them using feature selection (Guyon and Elisseeff 2003) for predictor selection,  
70 and random forests (RF) (Breiman 2001) for predictive modelling. The advantage of using  
71 machine learning and predictive modelling is its ability to handle data with non-normal  
72 distribution and noise, and use robust training-and-testing analysis to make predictions for  
73 informed decision making (Thessen 2016; Willcock et al. 2018). We discuss the associations  
74 between predictors and pollinators and which predictors are best suited to management for  
75 improving the diversity and resilience of pollinator communities.

## 76 **Methods**

### 77 *Study area*

78 The Tasman Peninsula, located on the south-eastern portion of Tasmania, Australia (Fig. 1),  
79 covers an area of 660.4 km<sup>2</sup> with elevation from 0 to 582 m a.s.l. (meters above sea level). It

80 is characterised by a mix of dry and wet sclerophyll eucalypt forest and dry coastal vegetation  
81 and supports a third of the vascular plants found in Tasmania (Brown and Duncan 1986). In  
82 terms of human activity, it is a mixed-use landscape, dominated by grazing pasture, forest  
83 plantations and protected areas (Department of Primary Industries Parks Water and  
84 Environment 2015), with protected areas covering 26.7% of its surface (Australian Bureau of  
85 Statistics 2020). The three LU (Table 1) were used as predictor variables for all pollinator  
86 groups.

87 **Table 1.** Characteristics of the different sites within each LU

| Land-use        | Sites                          | Characteristics                                                                                                                                                                                                                                         |
|-----------------|--------------------------------|---------------------------------------------------------------------------------------------------------------------------------------------------------------------------------------------------------------------------------------------------------|
| Protected areas | Lime Bay State reserve (LBR)   | Coastal woodland, with pockets of dense tree but overall open canopy cover and dense ground vegetation.                                                                                                                                                 |
|                 | Tasman National park (TNP) (a) | Sclerophyll forest with dense canopy cover and dense ground vegetation.                                                                                                                                                                                 |
|                 | Tasman National park (TNP) (b) | Sclerophyll forest, with moderate canopy and open ground vegetation.                                                                                                                                                                                    |
| Plantations     | Plantation (a)                 | Contains patches of eucalypt and pine forest plantations and non-plantation eucalypt forest where fieldwork was carried out. Sclerophyll forest with dense canopy and ground cover.                                                                     |
|                 | Plantation (b)                 | Contains patches of eucalypt forest and pine plantations and non-plantation eucalypt forest where fieldwork was carried out. Sclerophyll forest with dense canopy and ground cover. We noticed more harvested coups in this site than in plantation (a) |
| Pasture         | Pasture                        | Pasture areas with cattle, with few isolated trees within the pasture.                                                                                                                                                                                  |

88

89 *Study design*

90 We established one observation site in a pasture, two in plantations and three in protected  
91 areas (Fig. 1). The unequal number of sites per land use was due to lack of accessibility. Each  
92 site consisted of two subsites 1-3 km apart and each subsite included three plots, with birds,  
93 bees, and beetles sampled in each plot, and one transect for butterfly sampling. The plots  
94 were at least 400 m apart and randomly distributed 80-100 m from a chosen walking track,  
95 while the transects were placed along the walking track between the three plots. In total there  
96 were 18 plots and six transects in protected areas, 12 plots and four transects in plantations  
97 and six plots and two transects in pasture.

98 Observations took place between 07.00 – 11.00 h and 16.00 – 19.00 h for birds and 10.00 –  
99 15.00 h for insects, under non-windy and non-rainy conditions. Sampling of all the  
100 investigated pollinator groups was then repeated monthly from September to December 2018  
101 to account for temporal changes in flowering vegetation.

102 Using the same methodology described above, a proof-of-concept pilot study was previously  
103 carried out in protected areas consisting of three sites with 12 plots and 6 transects (Fig. 1)  
104 from January to February 2018.

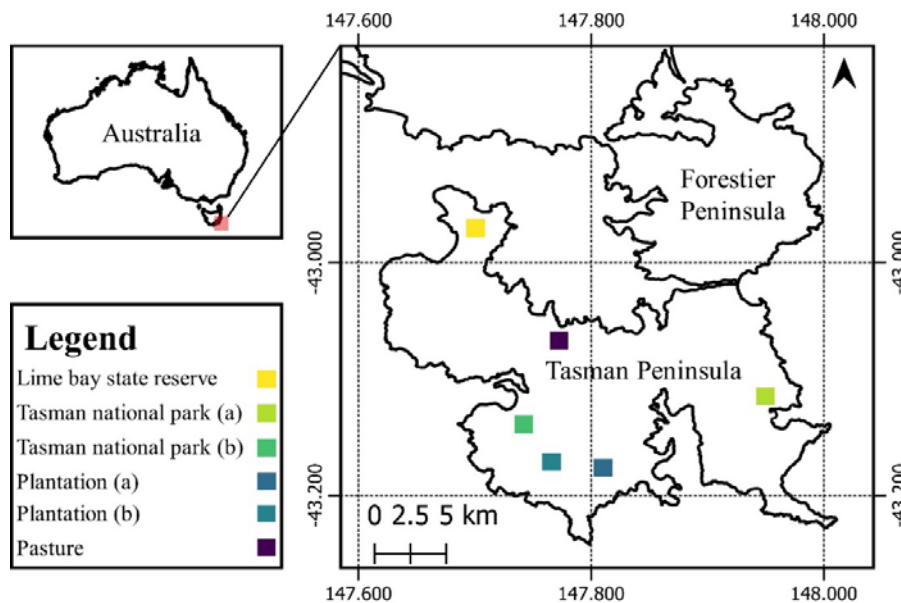

105

106 **Fig. 1** Location of the sampling sites in the Tasman Peninsula, Tasmania, Australia.

107 *Pollinator sampling and plant identification*

108 Birds were visually observed using a standardised point-count method within a 2-ha plot for  
109 20 minutes (BirdLife 2020). Honeyeaters (family *Meliphagidae*), were the only birds  
110 considered for this study as they are dominant group of nectivorous birds in Australia (Ford  
111 and Paton 1977). Honeyeater count and species were recorded with species grouped into  
112 endemic (native to Australia but present only in Tasmania) and non-endemic (native to  
113 Australia and present throughout Australia) honeyeaters.

114 *Eucalyptus* tree species within the 2-ha plots were recorded (presence/absence) and identified  
115 using a field guide by Wiltshire and Potts (2007). They were grouped into *Symphyomyrtus*  
116 and *Eucalyptus* (formerly *Monocalyptus*) sub-genera (Nicolle 2015) and used as predictors  
117 for honeyeaters richness and abundance, as they have been shown to influence honeyeater  
118 presence (Dunkerley et al. 1990; Woinarski and Cullen 1984).

119 Bees and beetles were recorded within the 2-ha plot by visually observing four ground-level  
120 flowering plants for 10 minutes each, as observational sampling is a commonly used  
121 technique to detect bee abundance (Prendergast et al. 2020). Both insects and plants were  
122 photographed to allow for off-site identification (where required). Bees were grouped into  
123 introduced bees and native bees; introduced bees included *Apis mellifera* (western honey bee)  
124 and *Bombus terrestris* (buff-tailed bumble bee), the only introduced species found in  
125 Tasmania ([https://www.environment.gov.au/biodiversity/invasive-species/insects-and-other-](https://www.environment.gov.au/biodiversity/invasive-species/insects-and-other-invertebrates/invasive-bees)  
126 [invertebrates/invasive-bees](https://www.environment.gov.au/biodiversity/invasive-species/insects-and-other-invertebrates/invasive-bees)), while native bees included all other bee species. Beetles were  
127 identified to family level using iNaturalist website (<https://inaturalist.org/>).

128 Where possible, four different species of flowering plant, separated by at least 5 m, were  
129 chosen, with new species selected during the repeated visits. If no flowering plants were



130 present, that resulted in zero observations. Plants were identified to species or genus level  
131 using the University of Tasmania key to Tasmanian vascular plants  
132 ([www.utas.edu.au/dicotkey/dicotkey/key.htm](http://www.utas.edu.au/dicotkey/dicotkey/key.htm)). The plants identified were grouped based on  
133 their colour and shape using a classification adopted from Hingston and Mc Quillan (2000).  
134 Colours were pale, yellow, and pink, while shapes were brush, tubular, actinomorphic, and  
135 zygomorphic.

136 Butterflies were sampled along a 1000-m long and 5-m wide transect (Pollard 1977). An  
137 insect net was used to catch butterflies and record the count and species. Species were  
138 photographed and identified using the reference Common and Waterhouse (1972).

#### 139 *Land-cover analysis*

140 Land Cover refers to the natural and artificial structures covering the land (Anderson et al.  
141 1976); the LC classes considered in this study are ‘forest’ (areas dominated by trees,  
142 including plantations), ‘open’ (areas with low-lying vegetation, including shrubs and  
143 grasses), ‘barren’ (areas lacking vegetation) and ‘water’ (quantified as the percentage of total  
144 cover at different spatial scales). The allocation of LC classes was inferred from Sentinel 2  
145 imagery as it has a high spatial resolution of  $10 \times 10$  m (Sentinel Online 2020).

146 The LC classification was done using machine learning algorithms – support vector machine  
147 (Cortes and Vapnik 1995), random forest (Breiman 2001), k-nearest neighbour (Cover and  
148 Hart 1967), and naïve Bayesian (Mitchell 1997) and averaging their results using an  
149 unweighted ensemble (Diengdoh et al. 2020) in R v1.3 (RStudio Team 2020) and QGIS  
150 v3.12 (QGIS Development Team 2020). Classification was implemented using the *caret* R  
151 package (Kuhn 2020).

152 Accuracy was assessed by comparing it to external/independent/unseen data. The external  
153 data consisted of 100 points/pixels per LC class, randomly selected from the classified image

154 and visually compared to imagery from Google Earth and from field data for accuracy  
155 assessment. Output metrics we report include the overall accuracy (OA), the true-skill  
156 statistic (TSS) for the classified image, and the sensitivity and specificity of each LC class,  
157 where: OA is the number of correctly classified pixels divided by the total number of pixels  
158 examined (Foody 2002); TSS is equal to the median of sensitivity plus specificity minus 1;  
159 sensitivity is observed presences that are predicted as such; while specificity observed  
160 absences that are predicted as such (Allouche et al. 2006). The method for LC classification  
161 is detailed in the Supplementary Material.

162 The percentage of each LC class was calculated within buffers of varying size for each  
163 pollinator group. For bees and beetles, we used buffers of 100 m radius from the centre of the  
164 plots, as well as 500 m, 1000 m and 2000 m, corresponding to a range of foraging distances  
165 of different bee species (Greenleaf et al. 2007). For honeyeaters, we used buffers of 100 m,  
166 2000 m, and 5000 m radius, similar to Smith et al. (2011) and Lasky and Keitt (2010).  
167 Buffers of 500 m, 1000 m, and 2000 m were used for butterflies, similar to Bergman et al.  
168 (2004).

### 169 *Statistical analyses*

170 Feature selection was used to identify the best predictors among those chosen for each  
171 pollinator group. Feature selection is a method used to find a subset of features with the  
172 minimum possible (out-of-sample) generalization error (Granitto et al. 2006). It can  
173 overcome high dimensionality (Guyon and Elisseeff 2003) and is important in datasets where  
174 the number of available training samples is smaller compared to the possible combination of  
175 features (Chen and Jeong 2007). Random-Forest-Recursive Feature Elimination (RF-RFE), a  
176 backward feature selection or recursive feature elimination method, was implemented in this  
177 study using the *caret* R package (Kuhn 2020). Feature ranking was based on a measure of

178 variable importance from the random forests fit. Leave-p-out cross validation was used,  
179 where p was 70/30 % (training/testing) with 500 iterations; p was indexed based on the  
180 number of plots (for honeyeater, bee, and beetle models) and sites (for butterfly models) to  
181 ensure training and testing data had a unique set to account for repeated observations.

182 Random forest was used for predictive modelling once the best set of predictors was  
183 identified, using the *randomForest* R package (Liaw and Wiener 2002). The goodness of fit  
184 and cross-validated  $R^2$  and root mean square error (RMSE) of each model were calculated.  
185 Cross-validation was carried out by splitting the data into a training/testing set using a  
186 random stratified method rather than a random percentage method. The stratification ensured  
187 that, for each plot/site with repeated observations, there was at least one repeated observation  
188 in the testing data that was not in the training data. Variable importance was calculated for  
189 each predictor in a model using the *ggRandomForests* R package (Ehrlinger 2016).

## 190 **Results**

### 191 *Pollinator richness and abundance*

192 We observed a total of 405 honeyeaters belonging to eight different species, of which four are  
193 endemic (186 individuals) and the remaining non-endemic (219 individuals). There was a  
194 total of 509 bees consisting of 230 introduced bees (214 honey bees and 16 bumble bees) and  
195 279 native bees (183 *Exoneura* genus, 48 *Lasioglossum* genus and 48 individuals classified as  
196 others). There was also a total of 423 beetles, belonging to nine families and a total of 202  
197 butterflies belonging to nine species. The observations for honeyeaters and butterflies were  
198 from the main and pilot study while for bees and beetles were only from the main study due  
199 to a lack of observations in the pilot. A list of species observed across the different LU and  
200 LU sites is included in the Supplementary (Table S1).

201 The median of the log abundance and richness of different pollinator groups differed across  
202 the three LU classes (Fig. 2) and the six LU sites (Fig. 3). Protected areas had an overall  
203 higher abundance and richness of different pollinator groups (Fig. 2) particularly at Lime Bay  
204 State Reserve (Fig. 3). Tasman National Park (b) had lower abundance of native bees,  
205 beetles, and butterflies (Fig. 3f, h-k) and richness of beetles and butterflies (Fig. 3f, h-k).  
206 Overall, plantations had a higher abundance of non-endemic honeyeaters than endemic  
207 honeyeaters (Fig. 2b, c) and lower abundance and richness of beetles (Fig. 2h, i). Plantation  
208 (a) supported both endemic and non-endemic honeyeaters (Fig. 3b, c) but had lower  
209 abundance and richness of beetles (Fig. 3h, i); Plantation (b) supported only non-endemic  
210 honeyeaters (Fig. 3b, c) but had higher abundance and richness of beetles (Fig. 3h, i). Sites in  
211 pastures had the lowest abundance and richness of beetles (Fig. 2h, i; Fig. 3h, i;) and no  
212 observed honeyeaters in either subsites (Fig. 2a-d; Fig. 3a-d) but had a high abundance of  
213 native and introduced bees (Fig. 2f, g; Fig. 3f, g) as well as an abundance and richness of  
214 butterflies (Fig. 2j, k; Fig. 3j, k).

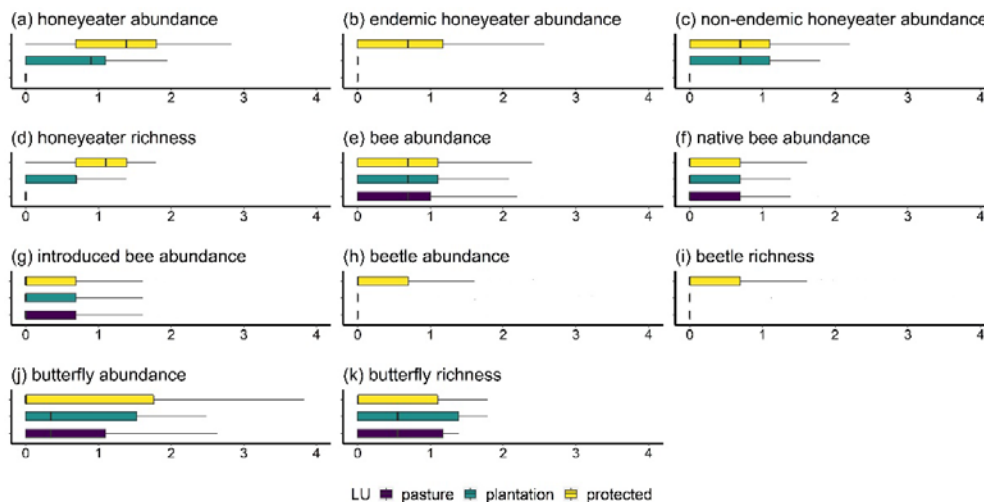

216 **Fig. 2** Log of total abundance and richness of honeyeaters including endemic and non-  
217 endemic honeyeaters (a-d), bees (e-g), beetles (h-i) and butterflies (j-k) in pastures,  
218 plantations, and protected areas.

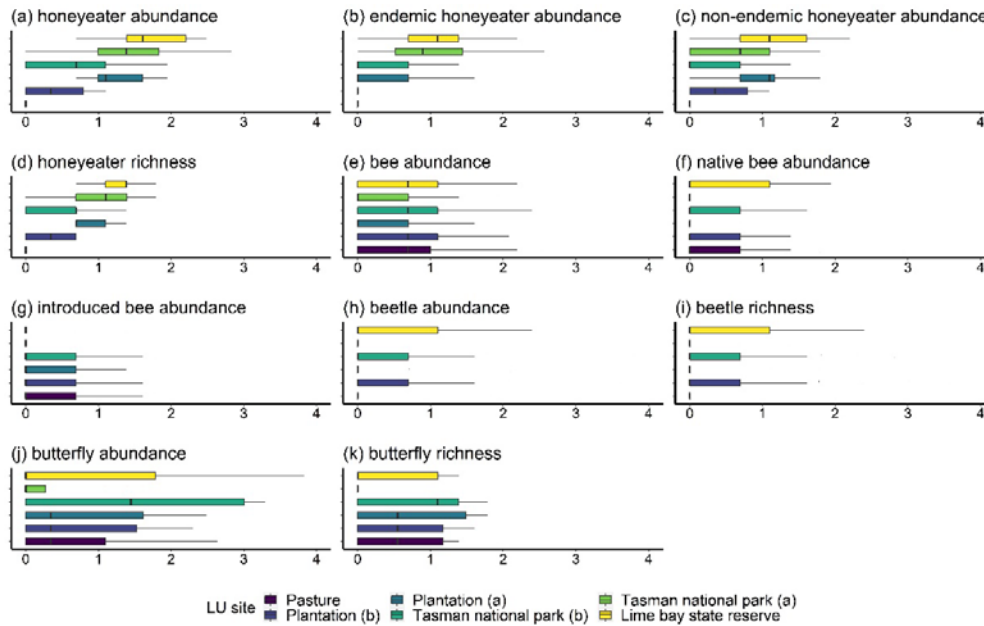

219

220 **Fig. 3** Log of total abundance and richness of honeyeaters including endemic and non-  
 221 endemic honeyeaters (a-d), bees (e-g), beetles (h-i) and butterflies (j-k) across pastures,  
 222 plantations (plantation a and b) and protected areas (Tasman National Park a and b, Lime Bay  
 223 State Reserve) LU sites.

224 Bees and beetles were observed visiting 24 plant genera, of which only three are  
 225 exotic/naturalised, i.e., *Arctotheca*, *Taraxacum* and *Trifolium*, which were only found in  
 226 pastures. The genera *Daviesia*, *Pultenaea*, and *Melaleuca* had the highest abundance of  
 227 native bees (Fig. 4a), while *Anopterus*, *Pimelea*, *Pomaderris*, and *Trifolium* had the highest  
 228 abundance of introduced bees (Fig. 4b) and *Leptospermum* the highest abundance of beetles  
 229 (Fig. 4a). *Symphyomyrtus* presence was associated with an overall higher abundance and  
 230 richness of honeyeaters (Fig. 5 e, h) compared to *Eucalyptus*. *Symphyomyrtus* also supported  
 231 a higher abundance of endemic honeyeaters (Fig. 5f) than *Eucalyptus*.

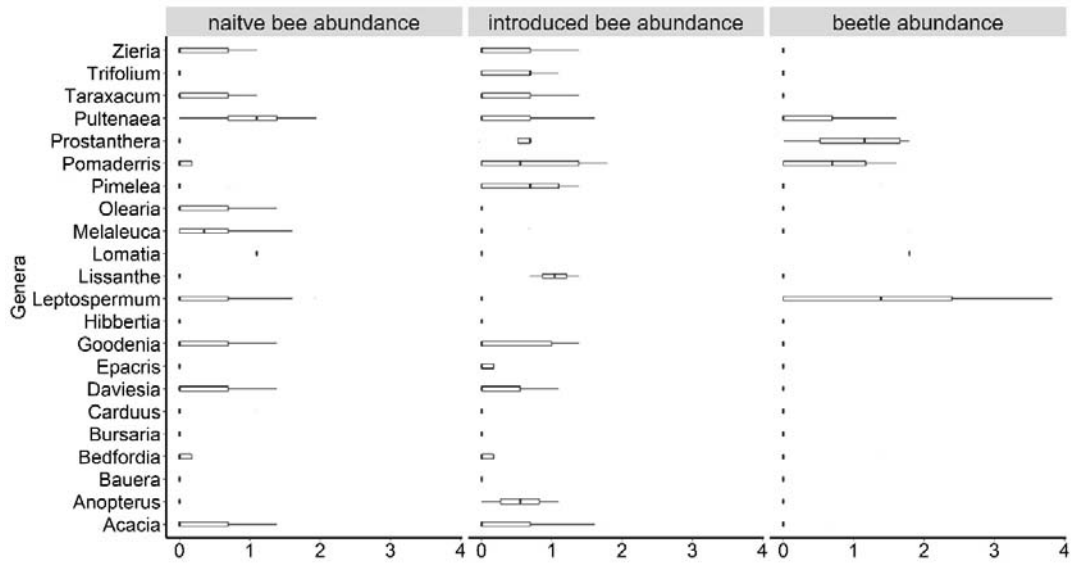

232

233 **Fig. 4** Log of total abundance of native bees, introduced bees, and beetles per genus.

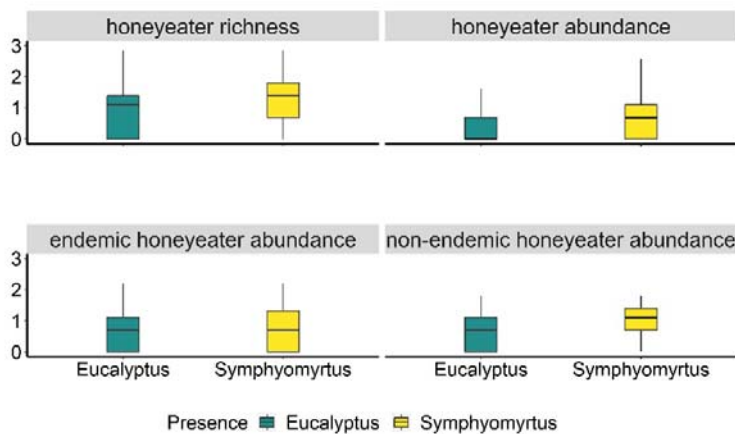

234

235 **Fig. 5** Log of total abundance and richness of honeyeaters across in presence of *Eucalyptus*  
 236 and *Symphyomyrtus* plant genera.

237 *Land-cover analysis*

238 The classified image (Supplementary Fig. S1) had an OA of 79.5% with 95% CI [75.21,  
 239 83.35] and TSS score of 77.41%. The confusion matrix of the classification results with  
 240 sensitivity and specificity of the LC classes and the classified image, as well as the

241 percentage of forest and open cover within different buffers across the three LU, are included  
242 in Supplementary (Table S2-S4).

### 243 *Predictors of pollinator richness and abundance*

244 Land use (i.e., human activities on the land) was not selected by RF-RFE as a predictor for  
245 any of the models except for butterfly abundance (Fig. 6). Two land cover (i.e., structures  
246 covering the land) classes—forest and open—were identified as important predictors in all  
247 models, with buffering size selection differing between honeyeaters, bees and beetles, and  
248 butterflies. Four plant genera, all native to Australia, were selected as predictors of bee and  
249 beetle abundance and richness (Fig. 6e-i). Floral shape – zygomorphic and actinomorphic,  
250 were selected for the native-bee and beetle models (Fig. 6f, h, i).

251 Structural goodness of fit ( $R^2$ ) results showed that butterfly abundance and butterfly richness  
252 had the highest and lowest  $R^2$  values, respectively (Fig. 6j, k).  $R^2$  values were highest in  
253 beetle models (Fig. 6j, i) followed by honeyeater models (Fig. 6a-d) and lowest in bee models  
254 (Fig. 6e-g).

255 Variable importance results from the random forests models show that, overall, LC had the  
256 highest importance value for most models except for beetle abundance and richness models,  
257 where *Leptospermum* was the most important (Fig. 6h, i). Buffers of 500 m, 1000 m, 2000 m  
258 and 5000 m were all important for honeyeaters (Fig. 6a-d), while buffers of 100 m and 2000  
259 m were important for bees and beetles (Fig. 6 e-i) and buffers of 500 m, 2000 m and 5000 m  
260 were important for butterflies (Fig 6j, k).

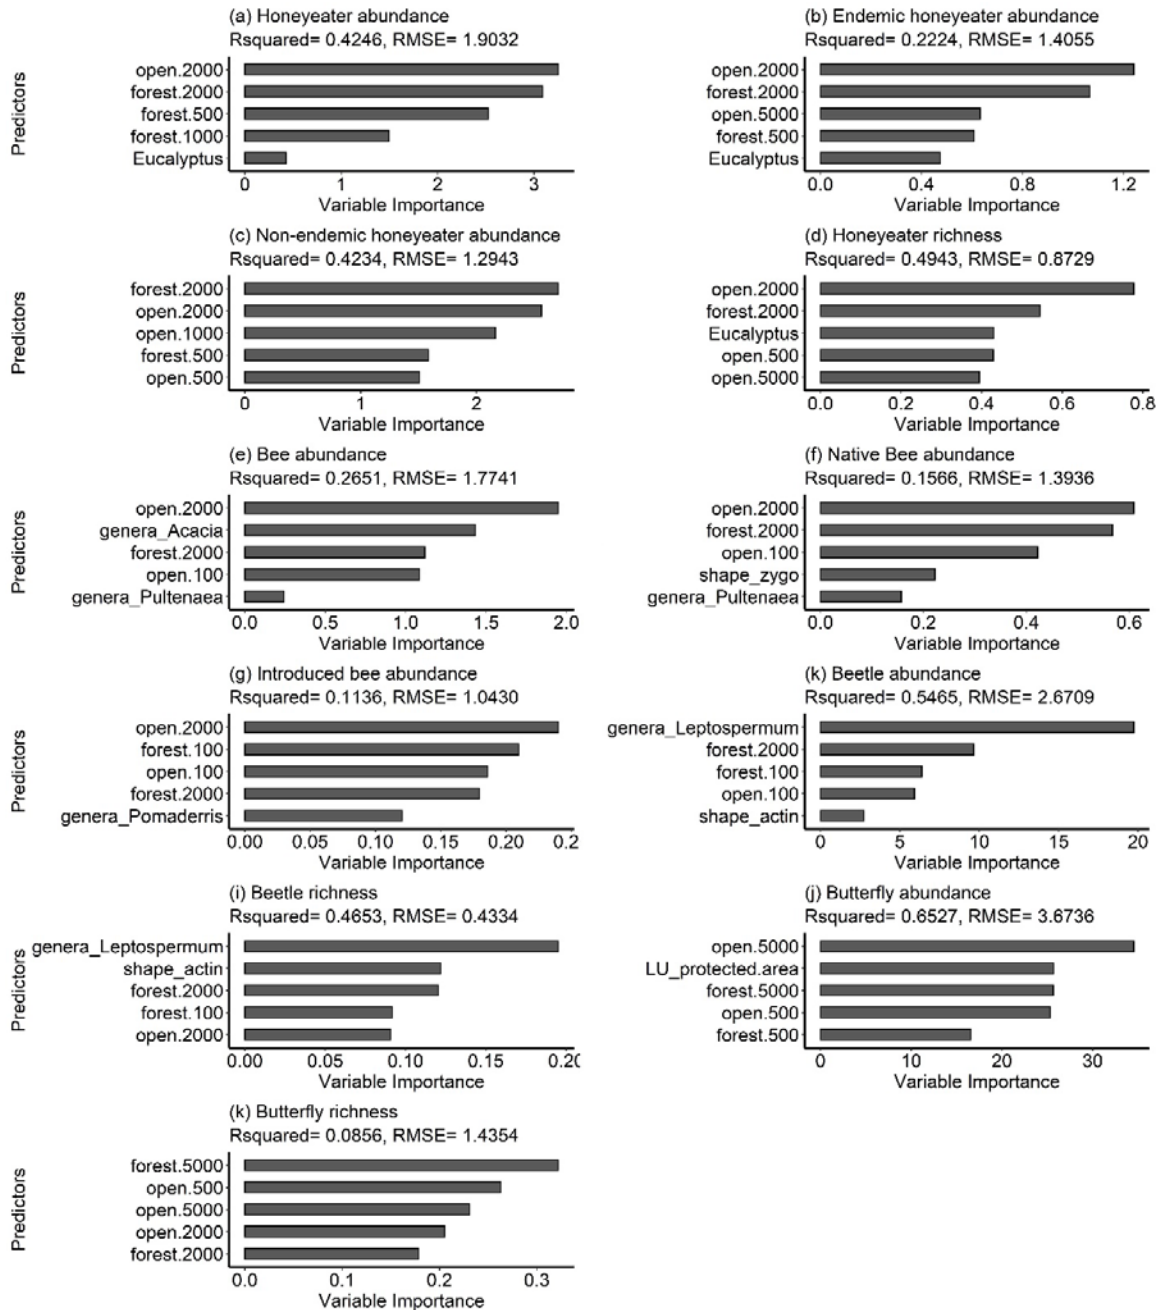

261

262 **Fig. 6** Variable importance of the predictors along with goodness of fit  $R^2$  and RMSE of the

263 models. The predictors forest.n or open.n refers to forest or open cover within buffer of size

264 n. Shape\_actin and shape\_zygo refers to actinomorphic and zygomorphic floral shapes.

265 **Discussion**



266 We assessed the richness and abundance of multiple pollinator groups across a mixed-use  
267 landscape, combined with the influence of different floral resources and morphologies, and  
268 found that pollinators were overall not affected by LU, whereas LC, plant genera, and floral  
269 shape were all determinants. Forest cover was relevant to all pollinator groups while open  
270 cover was important for bees, beetles, and butterflies, but not birds. Buffers of 2000 m and  
271 below were important for all pollinators while 5000 m and below were important for  
272 butterflies. The plant genera *Acacia*, *Pultenaea*, *Pomaderris* and *Leptospermum* were the  
273 most important identified drivers of native bee and beetles, while *Eucalyptus* was a relevant  
274 predictor for all honeyeater models except for non-endemic honeyeater abundance. In short,  
275 land cover and the distribution of diverse floral resources are crucial determinants of the  
276 health of pollinator communities.

277 Land use was generally a poor predictor even though pollinator abundance and richness  
278 varied between and within the three LU types (Figs. 2, 3). We suspect the poor prediction is  
279 because our study region does not include extremely modified land use types (e.g., pure  
280 agriculture, or urban). Indeed, a meta-analysis by Winfree et al. (2009) found that habitat loss  
281 and fragmentation severely impacted bees only in landscapes with little-to-no natural habitat  
282 remaining. The variation in pollinator richness and abundance recorded between and within  
283 the three LU types is thus likely to be predominantly driven by differences in forest cover and  
284 availability of resources. For example, pastures with trees and high floral diversity have been  
285 found to have higher abundance of nectivorous birds (Kavanagh et al. 2007) and beetles  
286 (Harris and Burns 2000) than pastures that lack such resources. Human activities could also  
287 influence pollinator presence. For example, the differences in endemic honeyeater abundance  
288 between the two plantation sites could be at least partially associated with forestry activities  
289 (e.g., harvesting) which have been shown to impact the diversity and abundance of endemic  
290 birds including honeyeaters (MacDonald et al. 2005). Although LU was a good predictor of

291 butterfly abundance, the large differences between the protected sites points to an explanation  
292 underpinned by habitat type, presence of host and nectar plants and micro-climatic  
293 conditions, all of which are known to influence butterfly assemblages (see Curtis et al. 2015;  
294 Eilers et al. 2013; Öckinger et al. 2012; Stefanescu et al. 2005).

295 Land Cover—specifically the presence of forest and open cover—were important predictors  
296 for all the pollinator groups. We suspect forest and open cover types could contain a variety  
297 of feeding and nesting resources essential for different pollinators (Kremen et al. 2007;  
298 Öckinger et al. 2012). Moreover, the positive and negative impacts these cover types are  
299 likely depend on the taxon; for example, open areas that lack floral resources—food and  
300 shelter—are likely to have a negative impact on honeyeaters and beetles (Harris and Burns  
301 2000; Kavanagh et al. 2007). Forest cover is known to influence birds presence in general  
302 (Trzcinski et al. 1999) and honeyeaters specifically (Harrisson et al. 2014). Further, high  
303 abundances of bees has been found in both forest (Taki et al. 2007, Ferreira et al. 2015) and  
304 open areas (Winfree et al. 2007, Kaluza et al. 2016), and forest cover has been shown  
305 elsewhere to be a good predictor of beetle assemblage (Sánchez-de-Jesús et al. 2016), with  
306 high amount of forest cover associated with higher abundance and richness of beetles (Watts  
307 and Larivière 2004). Although Posa and Sodhi (2006) found LC to have a weak correlation  
308 with a butterfly assemblage, we hypothesise that this difference might be due to the higher  
309 relative availability of resources in tropical (their study) versus temperate (our study) regions.

310 The buffers around forest and open land-cover types were important presumably because  
311 these contain within them smaller patches of resources. Butterflies, being mobile organisms,  
312 can use the resources from the surrounding landscape (Liivamägi et al. 2014) and we expect  
313 the same for other flying insects like bees and beetles. The spatial distribution of resources  
314 seems to drive buffer sizes, in general, as buffers for bees are known to vary (see Goulson et  
315 al. 2010; Pisanty and Mandelik 2015; Taki et al. 2007). Forest cover within 2000 m, but not

316 5000 m, was most important for honeyeaters. This might be explained by their territorial  
317 behaviour (Phillips et al. 2010), which allows them to monopolise patches of resources.

318 The presence of *Eucalyptus* was an important predictor for all honeyeater models except non-  
319 endemics, and we suspect it to have a relatively negative effect compared to *Symphyomyrtus*  
320 trees (Fig. 5). *Symphyomyrtus* trees are known to higher abundance of arthropods (Dunkerley  
321 et al. 1990; Saunders and Burgin 2001) particularly in summer (when fieldwork was carried  
322 out) which could explain why we observed a higher abundance and richness of honeyeaters  
323 particularly endemics which included the more insectivorous Yellow-throated, Strong-billed,  
324 and Black-headed honeyeaters (Thomas 1980).

325 *Acacia* and *Pultenaea* were relevant predictors for total bee abundance, *Pultenaea* and  
326 *Pomaderris* for native and introduced bee abundance richness, respectively, and  
327 *Leptospermum* for both beetle abundance and richness. All these relationships have plausible  
328 biological underpinnings. *Acacia*, for example, produces copious pollen (Stone et al. 2003)  
329 which is essential for larval provisions for almost all bees (Brosi et al. 2007), and *Pultenaea*  
330 and *Pomaderris* contain nectar and pollen and have been found be pollinated by bees, beetles  
331 and butterflies (Armstrong 1979; De Kok and West 2004; Ogilvie et al. 2009).

332 *Leptospermum*, in addition to providing nectar and pollen, is also a rich source of fruits and  
333 grass-root material which beetles and their larvae feed upon (Andersen and New 1987;  
334 Stephens et al. 2005).

335 Floral shape, but not colour, was also predictive, with zygomorphic and actinomorphic-  
336 shaped plants relevant for native bees and beetles, respectively. The zygomorphic shape of  
337 some flowers could be important for native bees as it includes native genera such as  
338 *Pultenaea* and *Goodenia*. These taxa have been shown to exhibit bee-pollination syndrome  
339 (i.e. flower features evolved in response to natural selection driven by bees) even though  
340 pollinator syndromes have been found inadequate as an explanation for pollinator visitation

341 in Tasmania (Hingston and Mc Quillan 2000). Actinomorphic shape could be important for  
342 beetles as they find it easier to land on simple dish- and bowl-shaped blossoms (Armstrong  
343 1979).

344 The goodness-of-fit statistics ( $R^2$ ) of the models indicates that several other factors, not  
345 measured in this study, might be required to improve the models. For honeyeater models, this  
346 could include availability of other feeding resources such as mana (a type of resin),  
347 honeydew and lerp (Paton 1980), and presence and abundance of other *Eucalyptus* species or  
348 other genera, perhaps in distributed in complex communities (Phillips et al. 2010). For bee  
349 models, this includes species-specific responses (Cariveau and Winfree 2015), ecological  
350 traits such as flight seasons (De Palma et al. 2015) and nesting habitat (Kremen et al. 2007).  
351 For beetle models, possible additional contributors are leaf litter, microclimate and soil  
352 variables (Fountain-Jones et al. 2015). For butterfly models, host plants for larvae, nectar  
353 plants for adults (Krämer et al. 2012), and micro-climatic conditions (Liivamägi et al. 2014),  
354 and all plausible additional determinants, perhaps in a large suite of tapering effects.

355 Like most studies of the determinants of pollinator ecology, this research is limited by  
356 considering LU and LC in their present conditions. Although a past-present comparison  
357 would be more adequate to assess impacts of changes on pollinators this would require  
358 baseline data on pollinators, which is lacking. The alternative—long-term monitoring—is a  
359 resource intensive undertaking, making comparative space-for-time assessments a logical  
360 substitute. One of the real-world constraints on this study was the frequent bad weather (wind  
361 and rain, making sampling impossible on many days within the field season), and the choice  
362 of a repeated sampling strategy (which yields higher precision within sites, at the cost of  
363 spatial bias). Future studies could consider including a mix of human observations and  
364 mechanised/automated methods such as acoustic recorders for birds (Wimmer et al. 2013)  
365 and photographic recording of bees (Steen 2017). The visual sampling of bees and beetles

366 allowed us to assess which plants they visited, but limited the taxonomic identification of  
367 insects, and small samples sizes of rarer taxa, made the testing of species-specific responses  
368 to the predictor variables infeasible.

369 A major advantage of the approach taken in this study, involving machine learning and  
370 predictive modelling, is in its ability to subject available data to robust assessment and use it  
371 to make informed decisions (Thessen 2016, Willcock et al. 2018). For example, what if a  
372 land manager of a plantation or pasture wanted to clear forested areas to improve  
373 production/yield, but still wanted to sustain a community of pollinators? Our results suggest  
374 that the optimal approach would be to create a mosaic of LC in the surrounding landscape,  
375 maintaining forest cover within a large spatial scale of 2000 m. The next best—or  
376 complementary—option to sustain a community of pollinators would be to plant floral  
377 resources with a brushed-shaped genus such as *Acacia*, the zygomorphic-shaped *Pultenaea*,  
378 or the actinomorphic-shaped *Pomaderris* and *Leptospermum*, so as to sustain a richness and  
379 abundance of bees and beetles which fall within a known a framework of choosing plants that  
380 provide nectar and/or pollen resources for a long temporal span (Menz et al. 2011), with a  
381 focus on native plants (M'Gonigle et al. 2015). Using trees consisting of a mix of the  
382 *Symphyomyrtus* and *Eucalyptus* subgenera would promote honeyeaters. Applied  
383 recommendations like this are based on evidence-based predictive results, which is valuable  
384 for pollinator-management decisions. Further, the implementation of our recommendations  
385 could then be used to validate our study's predictions, to improve future predictions in an  
386 adaptive-management framework.

## 387 **Declarations**

## 388 *Funding*

389 This work was supported by the Australian Research Council [grant number FL160100101].

390 *Conflicts of Interest*

391 None.

392 *Ethics approval*

393 Fieldwork was carried out in accordance with the ethics outlined by the Animal Ethics  
394 Committee, University of Tasmania under Project No: A0016856 and Department of Primary  
395 Industries, Parks, Water and Environment (DPIPWE) Tasmania, for fieldwork permits in  
396 protected areas, under Authority No's. FA17315 and FA18185.

397 *Consent to participate*

398 Not applicable.

399 *Consent for publication*

400 All the authors have reviewed the manuscript and provided consent for publication.

401 *Availability of data and material*

402 Included in the supplementary material.

403 *Code availability*

404 Not included but available on request.

405 *Author Contributions*

406 VLD proposed and designed the study, carried out the fieldwork, analysed the data and wrote  
407 the manuscript. BWB contributed significantly to the study design and writing of the  
408 manuscript. MH contributed to the study design and writing of the manuscript. SO  
409 contributed significantly to study design and writing of the manuscript.

## 410 **References**

- 411 Allouche O, Tsoar A, Kadmon R (2006) Assessing the accuracy of species distribution  
412 models: prevalence, kappa and the true skill statistic (TSS). *Journal of Applied*  
413 *Ecology* 43:1223-1232. <https://doi.org/10.1111/j.1365-2664.2006.01214.x>
- 414 Andersen AN, New T (1987) Insect inhabitants of fruits of *Leptospermum*, *Eucalyptus* and  
415 *Casuarina* in southeastern Australia. *Australian Journal of Zoology* 35:327-336.  
416 <https://doi.org/10.1071/ZO9870327>
- 417 Anderson JR, Hardy EE, Roach JT, Witmer RE (1976) A land use and land cover  
418 classification system for use with remote sensor data. Professional Paper 964. US  
419 Government Printing Office, Washington DC <https://doi.org/10.3133/pp964>
- 420 Archer CR, Pirk CWW, Carnevalheiro LG, Nicolson SW (2014) Economic and ecological  
421 implications of geographic bias in pollinator ecology in the light of pollinator  
422 declines. *Oikos* 123:401-407. <https://doi.org/10.1111/j.1600-0706.2013.00949.x>
- 423 Armstrong J (1979) Biotic pollination mechanisms in the Australian flora—a review. *New*  
424 *Zealand Journal of Botany* 17:467-508.  
425 <https://doi.org/10.1080/0028825X.1979.10432565>
- 426 Australian Bureau of Statistics (2020) Tasman, Region Data Summary.  
427 [https://itt.abs.gov.au/itt/r.jsp?RegionSummary&region=65210&dataset=ABS\\_REGIONAL\\_LGA2018&geoconcept=LGA\\_2018&maplayerid=LGA2018&measure=MEASURE&datasetASGS=ABS\\_REGIONAL\\_ASGS2016&datasetLGA=ABS\\_REGIONAL\\_LGA2018&regionLGA=LGA\\_2018&regionASGS=ASGS\\_2016](https://itt.abs.gov.au/itt/r.jsp?RegionSummary&region=65210&dataset=ABS_REGIONAL_LGA2018&geoconcept=LGA_2018&maplayerid=LGA2018&measure=MEASURE&datasetASGS=ABS_REGIONAL_ASGS2016&datasetLGA=ABS_REGIONAL_LGA2018&regionLGA=LGA_2018&regionASGS=ASGS_2016). Accessed 24  
430 April 2020
- 432 Baker M, Duretto M (2019) A census of the vascular plants of Tasmania, including  
433 Macquarie Island. Tasmanian Herbarium, Tasmanian Museum and Art Gallery,  
434 Hobart. [www.tmag.tas.gov.au](http://www.tmag.tas.gov.au)
- 435 Baude M, Kunin WE, Boatman ND, Conyers S, Davies N, Gillespie MA, Morton RD, Smart  
436 SM, Memmott J (2016) Historical nectar assessment reveals the fall and rise of floral  
437 resources in Britain. *Nature* 530:85. <https://doi.org/10.1038/nature16532>
- 438 Bergman KO, Askling J, Ekberg O, Ignell H, Wahlman H, Milberg P (2004) Landscape  
439 effects on butterfly assemblages in an agricultural region. *Ecography* 27:619-628.  
440 <https://doi.org/10.1111/j.0906-7590.2004.03906.x>
- 441 BirdLife (2020) Survey Techniques. <https://birddata.birdlife.org.au/survey-techniques>.  
442 Accessed 18 May 2020
- 443 Breiman L (2001) Random forests. *Machine Learning* 45:5-32.  
444 <https://doi.org/10.1023/A:1010933404324>
- 445 Brosi BJ, Daily GC, Ehrlich PR (2007) Bee community shifts with landscape context in a  
446 tropical countryside. *Ecological Applications* 17:418-430. <https://doi.org/10.1890/06-0029>
- 448 Brown M, Duncan F (1986) The vegetation of Tasman Peninsula. *Papers and Proceedings of*  
449 *the Royal Society of Tasmania* 33-50.
- 450 Cariveau DP, Winfree R (2015) Causes of variation in wild bee responses to anthropogenic  
451 drivers. *Current Opinion in Insect Science* 10:104-109.  
452 <https://doi.org/10.1016/j.cois.2015.05.004>

- 453 Chen X-w, Jeong JC (2007) Enhanced recursive feature elimination. Sixth International  
454 Conference on Machine Learning and Applications, Cincinnati, USA 429-435. IEEE.  
455 <https://doi.org/10.1109/ICMLA.2007.35>
- 456 Common IFB, Waterhouse DF (1972) Butterflies of Australia. Angus and Robertson, Sydney
- 457 Cortes C, Vapnik V (1995) Support-Vector Networks. Machine Learning 20:273-297.  
458 <https://doi.org/10.1023/A:1022627411411>
- 459 Cover TM, Hart PE (1967) Nearest Neighbor Pattern Classification. Ieee Transactions on  
460 Information Theory 13:21-27. <https://doi.org/10.1109/Tit.1967.1053964>
- 461 Curtis RJ, Brereton TM, Dennis RL, Carbone C, Isaac NJ (2015) Butterfly abundance is  
462 determined by food availability and is mediated by species traits. Journal of Applied  
463 Ecology 52:1676-1684. <https://doi.org/10.1111/1365-2664.12523>
- 464 De Kok R, West J (2004) A revision of the genus *Pultenaea* (Fabaceae). 3. The eastern  
465 species with recurved leaves. Australian Systematic Botany 17:273-326.  
466 <https://doi.org/10.1071/SB02028>
- 467 De Palma A, Abrahamczyk S, Aizen MA, Albrecht M, Basset Y, Bates A, Blake RJ, Boutin  
468 C, Bugter R, Connop S (2016) Predicting bee community responses to land-use  
469 changes: Effects of geographic and taxonomic biases. Scientific reports 6:31153.  
470 <https://doi.org/10.1038/srep31153>
- 471 De Palma A, Kuhlmann M, Roberts SP, Potts SG, Börger L, Hudson LN, Lysenko I,  
472 Newbold T, Purvis A (2015) Ecological traits affect the sensitivity of bees to  
473 land use pressures in European agricultural landscapes. Journal of Applied Ecology  
474 52:1567-1577. <https://doi.org/10.1111/1365-2664.12524>
- 475 Department of Primary Industries Parks Water and Environment (2015) Tasmanian Land Use  
476 2015. <http://www.agriculture.gov.au/abares/aclump/land-use/land-use-mapping>
- 477 Diengdoh VL, Ondei S, Hunt M, Brook BW (2020) A validated ensemble method for  
478 multinomial land-cover classification. Ecological Informatics 56:101065.  
479 <https://doi.org/10.1016/j.ecoinf.2020.101065>
- 480 Dunkerley GM, Ford H, Danthanarayana W (1990) The fuscous honeyeater: food resources  
481 and the bird community. Dissertation, University of New England
- 482 Ehrlinger J (2016) ggRandomForests: Visually Exploring Random Forests. version 2.0.1.  
483 <https://github.com/ehrlinger/ggRandomForests>
- 484 Eilers S, Pettersson LB, Öckinger E (2013) Microclimate determines oviposition site  
485 selection and abundance in the butterfly *Pyrgus armoricanus* at its northern range  
486 margin. Ecological Entomology 38:183-192. <https://doi.org/10.1111/een.12008>
- 487 Foody GM (2002) Status of land cover classification accuracy assessment. Remote Sensing  
488 of Environment 80:185-201. [https://doi.org/10.1016/S0034-4257\(01\)00295-4](https://doi.org/10.1016/S0034-4257(01)00295-4)
- 489 Ford HA, Paton DC (1977) The comparative ecology of ten species of honeyeaters in South  
490 Australia. Australian Journal of Ecology 2:399-407. <https://doi.org/10.1111/j.1442-9993.1977.tb01155.x>
- 491
- 492 Fountain-Jones NM, Jordan GJ, Baker TP, Balmer JM, Wardlaw T, Baker SC (2015) Living  
493 near the edge: being close to mature forest increases the rate of succession in beetle  
494 communities. Ecological Applications 25:800-811. <https://doi.org/10.1890/14-0334.1>



- 495 Goulson D, Lepais O, O'Connor S, Osborne JL, Sanderson RA, Cussans J, Goffe L, Darvill  
496 B (2010) Effects of land use at a landscape scale on bumblebee nest density and  
497 survival. *Journal of Applied Ecology* 47:1207-1215. [https://doi.org/10.1111/j.1365-  
498 2664.2010.01872.x](https://doi.org/10.1111/j.1365-2664.2010.01872.x)
- 499 Granitto PM, Furlanello C, Biasioli F, Gasperi F (2006) Recursive feature elimination with  
500 random forest for PTR-MS analysis of agroindustrial products. *Chemometrics and  
501 Intelligent Laboratory Systems* 83:83-90.  
502 <https://doi.org/10.1016/j.chemolab.2006.01.007>
- 503 Greenleaf SS, Williams NM, Winfree R, Kremen C (2007) Bee foraging ranges and their  
504 relationship to body size. *Oecologia* 153:589-596. [https://doi.org/10.1007/s00442-  
505 007-0752-9](https://doi.org/10.1007/s00442-007-0752-9)
- 506 Guyon I, Elisseeff A (2003) An introduction to variable and feature selection. *Journal of  
507 machine learning research* 3:1157-1182.
- 508 Harris RJ, Burns BR (2000) Beetle assemblages of kahikatea forest fragments in a pasture-  
509 dominated landscape. *New Zealand Journal of Ecology*:57-67.
- 510 Harrisson KA, Pavlova A, Amos JN, Radford JQ, Sunnucks P (2014) Does reduced mobility  
511 through fragmented landscapes explain patch extinction patterns for three  
512 honeyeaters? *Journal of Animal Ecology* 83:616-627. [https://doi.org/10.1111/1365-  
513 2656.12172](https://doi.org/10.1111/1365-2656.12172)
- 514 Herrera CM (2018) Complex long-term dynamics of pollinator abundance in undisturbed  
515 Mediterranean montane habitats over two decades. *Ecological Monographs*  
516 <https://doi.org/10.1002/ecm.1338>
- 517 Hingston AB, Mc Quillan PB (2000) Are pollination syndromes useful predictors of floral  
518 visitors in Tasmania? *Austral Ecology* 25:600-609. [https://doi.org/10.1111/j.1442-  
519 9993.2000.tb00065.x](https://doi.org/10.1111/j.1442-9993.2000.tb00065.x)
- 520 Kavanagh RP, Stanton MA, Herring MW (2007) Eucalypt plantings on farms benefit  
521 woodland birds in south-eastern Australia. *Austral Ecology* 32:635-650.  
522 <https://doi.org/10.1111/j.1442-9993.2007.01746.x>
- 523 Kevan PG, Viana BF (2003) The global decline of pollination services. *Biodiversity* 4:3-8.  
524 <https://doi.org/10.1080/14888386.2003.9712703>
- 525 Klein AM, Vaissiere BE, Cane JH, Steffan-Dewenter I, Cunningham SA, Kremen C,  
526 Tscharrntke T (2007) Importance of pollinators in changing landscapes for world  
527 crops. *Proceedings of the Royal Society B: Biological Sciences* 274:303-313.  
528 <https://doi.org/10.1098/rspb.2006.3721>
- 529 Krämer B, Poniatowski D, Fartmann T (2012) Effects of landscape and habitat quality on  
530 butterfly communities in pre-alpine calcareous grasslands. *Biological Conservation*  
531 152:253-261. <https://doi.org/10.1016/j.biocon.2012.03.038>
- 532 Kremen C, Williams NM, Aizen MA, Gemmill-Herren B, LeBuhn G, Minckley R, Packer  
533 L, Potts SG, Roulston Ta, Steffan-Dewenter I (2007) Pollination and other  
534 ecosystem services produced by mobile organisms: a conceptual framework for the  
535 effects of land-use change. *Ecology Letters* 10:299-314.  
536 <https://doi.org/10.1111/j.1461-0248.2007.01018.x>
- 537 Kuhn M (2020) caret: Classification and Regression Training. version 6.0-86.  
538 <https://github.com/topepo/caret/>

- 539 Lasky JR, Keitt TH (2010) Abundance of Panamanian dry-forest birds along gradients of  
540 forest cover at multiple scales. *Journal of Tropical Ecology* 26:67-78.  
541 <https://doi.org/10.1017/S0266467409990368>
- 542 Liaw A, Wiener M (2002) Classification and Regression by randomForest. version 4.6-14.  
543 <https://CRAN.R-project.org/doc/Rnews/>
- 544 Liivamägi A, Kuusemets V, Kaart T, Luig J, Diaz-Forero I (2014) Influence of habitat and  
545 landscape on butterfly diversity of semi-natural meadows within forest-dominated  
546 landscapes. *Journal of Insect Conservation* 18:1137-1145.  
547 <https://doi.org/10.1007/s10841-014-9724-7>
- 548 M'Gonigle LK, Ponisio LC, Cutler K, Kremen C (2015) Habitat restoration promotes  
549 pollinator persistence and colonization in intensively managed agriculture. *Ecological*  
550 *Applications* 25:1557-1565. <https://doi.org/10.1890/14-1863.1>
- 551 MacDonald MA, Apiolaza LA, Grove S (2005) The birds of retained vegetation corridors: A  
552 pre-and post-logging comparison in dry sclerophyll forest in Tasmania. *Forest*  
553 *Ecology and Management* 218:277-290. <https://doi.org/10.1016/j.foreco.2005.08.027>
- 554 Maes D, Van Dyck H (2001) Butterfly diversity loss in Flanders (north Belgium): Europe's  
555 worst case scenario? *Biological Conservation* 99:263-276.  
556 [https://doi.org/10.1016/S0006-3207\(00\)00182-8](https://doi.org/10.1016/S0006-3207(00)00182-8)
- 557 Menz MH, Phillips RD, Winfree R, Kremen C, Aizen MA, Johnson SD, Dixon KW (2011)  
558 Reconnecting plants and pollinators: challenges in the restoration of pollination  
559 mutualisms. *Trends in plant science* 16:4-12.  
560 <https://doi.org/10.1016/j.tplants.2010.09.006>
- 561 Mitchell T (1997) *Machine Learning*. McGraw-Hill Science/Engineering/Math, New York
- 562 Montero-Castaño A, Vilà M (2012) Impact of landscape alteration and invasions on  
563 pollinators: a meta-analysis. *Journal of Ecology* 100:884-893.  
564 <https://doi.org/10.1111/j.1365-2745.2012.01968.x>
- 565 Nicolle D (2015) Classification of the eucalypts (Angophora, Corymbia and Eucalyptus)  
566 Version 4. <https://dn.com.au/Classification-Of-The-Eucalypts.pdf>.
- 567 Nicolson SW, Wright GA (2017) Plant–pollinator interactions and threats to pollination:  
568 perspectives from the flower to the landscape. *Functional Ecology* 31:22-25.  
569 <https://doi.org/10.1111/1365-2435.12810>
- 570 Öckinger E, Bergman K-O, Franzén M, Kadlec T, Krauss J, Kuussaari M, Pöyry J, Smith  
571 HG, Steffan-Dewenter I, Bommarco R (2012) The landscape matrix modifies the  
572 effect of habitat fragmentation in grassland butterflies. *Landscape ecology* 27:121-  
573 131. <https://doi.org/10.1007/s10980-011-9686-z>
- 574 Öckinger E, Smith HG (2006) Landscape composition and habitat area affects butterfly  
575 species richness in semi-natural grasslands. *Oecologia* 149:526-534.  
576 <https://doi.org/10.1007/s00442-006-0464-6>
- 577 Ogilvie JE, Zalucki JM, Boulter SL (2009) Pollination biology of the sclerophyllous shrub  
578 *Pultenaea villosa* Willd.(Fabaceae) in southeast Queensland, Australia. *Plant Species*  
579 *Biology* 24:11-19. <https://doi.org/10.1111/j.1442-1984.2009.00235.x>
- 580 Ollerton J, Erenler H, Edwards M, Crockett R (2014) Pollinator declines. Extinctions of  
581 aculeate pollinators in Britain and the role of large-scale agricultural changes. *Science*  
582 346:1360-1362. <https://doi.org/10.1126/science.1257259>

- 583 Ollerton J, Winfree R, Tarrant S (2011) How many flowering plants are pollinated by  
584 animals? *Oikos* 120:321-326. <https://doi.org/10.1111/j.1600-0706.2010.18644.x>
- 585 Paton DC (1980) The importance of manna, honeydew and lerp in the diets of honeyeaters.  
586 *Emu* 80:213-226. <https://doi.org/10.1071/MU9800213>
- 587 Paton DC (2000) Disruption of bird-plant pollination systems in southern Australia.  
588 *Conservation Biology* 14:1232-1234. <https://doi.org/10.1046/j.1523-1739.2000.00015.x>
- 590 Phillips RD, Hopper SD, Dixon KW (2010) Pollination ecology and the possible impacts of  
591 environmental change in the Southwest Australian Biodiversity Hotspot.  
592 *Philosophical Transactions of the Royal Society B: Biological Sciences* 365:517-528.  
593 <https://doi.org/10.1098/rstb.2009.0238>
- 594 Pisanty G, Mandelik Y (2015) Profiling crop pollinators: life history traits predict habitat use  
595 and crop visitation by Mediterranean wild bees. *Ecological Applications* 25:742-752.  
596 <https://doi.org/10.1890/14-0910.1>
- 597 Pollard E (1977) A method for assessing changes in the abundance of butterflies. *Biological*  
598 *Conservation* 12:115-134. [https://doi.org/10.1016/0006-3207\(77\)90065-9](https://doi.org/10.1016/0006-3207(77)90065-9)
- 599 Posa MRC, Sodhi NS (2006) Effects of anthropogenic land use on forest birds and butterflies  
600 in Subic Bay, Philippines. *Biological Conservation* 129:256-270.  
601 <https://doi.org/10.1016/j.biocon.2005.10.041>
- 602 Potts SG, Biesmeijer JC, Kremen C, Neumann P, Schweiger O, Kunin WE (2010) Global  
603 pollinator declines: trends, impacts and drivers. *Trends in Ecology & Evolution*  
604 25:345-353. <https://doi.org/10.1016/j.tree.2010.01.007>
- 605 Prendergast KS, Menz MHM, Dixon KW, Bateman PW (2020) The relative performance of  
606 sampling methods for native bees: an empirical test and review of the literature.  
607 *Ecosphere* 11:e03076. <https://doi.org/10.1002/ecs2.3076>
- 608 QGIS Development Team (2020) QGIS Geographic Information System. Open Source  
609 Geospatial Foundation Project. version 3.12. <https://qgis.osgeo.org>
- 610 Rader R, Bartomeus I, Garibaldi LA, Garratt MP, Howlett BG, Winfree R, Cunningham SA,  
611 Mayfield MM, Arthur AD, Andersson GK, Bommarco R, Brittain C, Carnevali LG,  
612 Chacoff NP, Entling MH, Foully B, Freitas BM, Gemmill-Herren B, Ghazoul J,  
613 Griffin SR, Gross CL, Herbertsson L, Herzog F, Hipolito J, Jaggar S, Jauker F, Klein  
614 AM, Kleijn D, Krishnan S, Lemos CQ, Lindstrom SA, Mandelik Y, Monteiro VM,  
615 Nelson W, Nilsson L, Pattemore DE, Pereira Nde O, Pisanty G, Potts SG, Reemer M,  
616 Rundlof M, Sheffield CS, Schepers J, Schuepp C, Smith HG, Stanley DA, Stout JC,  
617 Szentgyorgyi H, Taki H, Vergara CH, Viana BF, Woyciechowski M (2016) Non-bee  
618 insects are important contributors to global crop pollination. *Proceedings of the*  
619 *National Academy of Sciences of the United States of America* 113:146-151.  
620 <https://doi.org/10.1073/pnas.1517092112>
- 621 Regan EC, Santini L, Ingwall-King L, Hoffmann M, Rondinini C, Symes A, Taylor J,  
622 Butchart SHM (2015) Global Trends in the Status of Bird and Mammal Pollinators.  
623 *Conservation Letters* 8:397-403. <https://doi.org/10.1111/conl.12162>
- 624 Roulston TaH, Goodell K (2011) The role of resources and risks in regulating wild bee  
625 populations. *Annual review of entomology* 56:293-312.  
626 <https://doi.org/10.1146/annurev-ento-120709-144802>

- 627 RStudio Team (2020) RStudio: Integrated Development Environment for R. version 1.3.  
628 <http://www.rstudio.com/>
- 629 Sánchez-de-Jesús HA, Arroyo-Rodríguez V, Andresen E, Escobar F (2016) Forest loss and  
630 matrix composition are the major drivers shaping dung beetle assemblages in a  
631 fragmented rainforest. *Landscape ecology* 31:843-854.  
632 <https://doi.org/10.1007/s10980-015-0293-2>
- 633 Saunders AS, Burgin S (2001) Selective foliage foraging by Red Wattlebirds, *Anthochaera*  
634 *carunculata*, and Noisy Friarbirds, *Philemon corniculatus*. *Emu* 101:163-166.  
635 <https://doi.org/10.1071/MU00007>
- 636 Sekercioglu CH (2006) Increasing awareness of avian ecological function. *Trends in Ecology*  
637 *& Evolution* 21:464-471. <https://doi.org/10.1016/j.tree.2006.05.007>
- 638 Senapathi D, Carneiro LG, Biesmeijer JC, Dodson CA, Evans RL, McKerchar M, Morton  
639 RD, Moss ED, Roberts SP, Kunin WE, Potts SG (2015) The impact of over 80 years  
640 of land cover changes on bee and wasp pollinator communities in England.  
641 *Proceedings of the Royal Society B: Biological Sciences* 282:20150294.  
642 <https://doi.org/10.1098/rspb.2015.0294>
- 643 Senapathi D, Goddard MA, Kunin WE, Baldock KCR (2017) Landscape impacts on  
644 pollinator communities in temperate systems: evidence and knowledge gaps.  
645 *Functional Ecology* 31:26-37. <https://doi.org/10.1111/1365-2435.12809>
- 646 Sentinel Online (2020) Sentinel-2 Spatial Resolutions  
647 <https://sentinel.esa.int/web/sentinel/user-guides/sentinel-2-msi/resolutions/spatial>.  
648 Accessed 18 May 2020
- 649 Smith AC, Fahrig L, Francis CM (2011) Landscape size affects the relative importance of  
650 habitat amount, habitat fragmentation, and matrix quality on forest birds. *Ecography*  
651 34:103-113. <https://doi.org/10.1111/j.1600-0587.2010.06201.x>
- 652 Steen R (2017) Diel activity, frequency and visit duration of pollinators in focal plants: in situ  
653 automatic camera monitoring and data processing. *Methods in Ecology and Evolution*  
654 8:203-213. <https://doi.org/10.1111/2041-210X.12654>
- 655 Stefanescu C, Peñuelas J, Filella I (2005) Butterflies highlight the conservation value of hay  
656 meadows highly threatened by land-use changes in a protected Mediterranean area.  
657 *Biological Conservation* 126:234-246. <https://doi.org/10.1016/j.biocon.2005.05.010>
- 658 Stephens J, Molan PC, Clarkson BD (2005) A review of *Leptospermum scoparium*  
659 (Myrtaceae) in New Zealand. *New Zealand Journal of Botany* 43:431-449.  
660 <https://doi.org/10.1080/0028825X.2005.9512966>
- 661 Stone GN, Raine NE, Prescott M, Willmer PG (2003) Pollination ecology of acacias  
662 (Fabaceae, Mimosoideae). *Australian Systematic Botany* 16:103-118.  
663 <https://doi.org/10.1071/SB02024>
- 664 Taki H, Kevan PG, Ascher JS (2007) Landscape effects of forest loss in a pollination system.  
665 *Landscape ecology* 22:1575-1587. <https://doi.org/10.1007/s10980-007-9153-z>
- 666 Thessen A (2016) Adoption of machine learning techniques in ecology and earth science.  
667 *One Ecosystem* 1:e8621. <https://doi.org/10.3897/oneeco.1.e8621>
- 668 Thomas D (1980) Foraging of honeyeaters in an area of Tasmanian sclerophyll forest. *Emu*  
669 80:55-58. <https://doi.org/10.1071/MU9800055>

- 670 Trzcinski MK, Fahrig L, Merriam G (1999) Independent effects of forest cover and  
671 fragmentation on the distribution of forest breeding birds. *Ecological Applications*  
672 9:586-593. [https://doi.org/10.1890/1051-0761\(1999\)009\[0586:IEOFCA\]2.0.CO;2](https://doi.org/10.1890/1051-0761(1999)009[0586:IEOFCA]2.0.CO;2)
- 673 Vanbergen AJ, Baude M, Biesmeijer JC, Britton NF, Brown MJF, Brown M, Bryden J,  
674 Budge GE, Bull JC, Carvell C, Challinor AJ, Connolly CN, Evans DJ, Feil EJ, Garratt  
675 MP, Greco MK, Heard MS, Jansen VAA, Keeling MJ, Kunis WE, Marris GC,  
676 Memmott J, Murray JT, Nicolson SW, Osborne JL, Paxton RJ, Pirk CWW, Polce C,  
677 Potts SG, Priest NK, Raine NE, Roberts S, Ryabov EV, Shafir S, Shirley MDF,  
678 Simpson SJ, Stevenson PC, Stone GN, Termansen M, Wright GA, Initiative IP (2013)  
679 Threats to an ecosystem service: pressures on pollinators. *Frontiers in Ecology and*  
680 *the Environment* 11:251-259. <https://doi.org/10.1890/120126>
- 681 Watts CH, Larivière M-C (2004) The importance of urban reserves for conserving beetle  
682 communities: a case study from New Zealand. *Journal of Insect Conservation* 8:47-  
683 58. <https://doi.org/10.1023/B:JICO.0000027504.92727.ab>
- 684 Willcock S, Martínez-López J, Hooftman DA, Bagstad KJ, Balbi S, Marzo A, Prato C,  
685 Sciandrello S, Signorello G, Voigt B (2018) Machine learning for ecosystem services.  
686 *Ecosystem services* 33:165-174. <https://doi.org/10.1016/j.ecoser.2018.04.004>
- 687 Wiltshire R, Potts B (2007) *EucaFlip-Life-size guide to the eucalypts of Tasmania*.  
688 University of Tasmania,
- 689 Wimmer J, Towsey M, Roe P, Williamson I (2013) Sampling environmental acoustic  
690 recordings to determine bird species richness. *Ecological Applications* 23:1419-1428.  
691 <https://doi.org/10.1890/12-2088.1>
- 692 Winfree R, Aguilar R, Vazquez DP, LeBuhn G, Aizen MA (2009) A meta-analysis of bees'  
693 responses to anthropogenic disturbance. *Ecology* 90:2068-2076.  
694 <https://doi.org/10.1890/08-1245.1>
- 695 Winfree R, Bartomeus I, Cariveau DP (2011) Native Pollinators in Anthropogenic Habitats.  
696 *Annual Review of Ecology, Evolution, and Systematics* 42:1-22.  
697 <https://doi.org/10.1146/annurev-ecolsys-102710-145042>
- 698 Woinarski J, Cullen J (1984) Distribution of invertebrates on foliage in forests of  
699 south-eastern Australia. *Australian Journal of Ecology* 9:207-232.  
700 <https://doi.org/10.1111/j.1442-9993.1984.tb01359.x>
- 701
